# Supplementary material for: Integrated analysis of single-cell and bulk RNA-sequencing data reveals the prognostic value and molecular function of THSD7A in gastric cancer
Source: Aging (Albany NY). 2023 Oct 30;15(21):11940–69. doi: 10.18632/aging.205158 (PMC10683630; doi:10.18632/aging.205158)
Supplement: Supplementary Table 1 [file aging-15-205158-s002.xls]

## Sheet: Sheet1
Supplementary Table 1. Gene clusters expressed along the pseudotime trajectory.
Gene	Clusters
VWA1	1
GABRD	1
CLSTN1	1
CTNNBIP1	1
LZIC	1
RBP7	1
UBE4B	1
UBIAD1	1
SPEN	1
RP11-108M9.6	1
ATP13A2	1
HSPG2	1
ID3	1
RPA2	1
ATPIF1	1
TRNAU1AP	1
CSMD2	1
NCDN	1
MYCBP	1
CCDC17	1
PIK3R3	1
PPAP2B	1
JUN	1
PKN2	1
GBP7	1
ARHGAP29	1
TXNIP	1
SELENBP1	1
SLC27A3	1
SHE	1
PBXIP1	1
EFNA1	1
ASH1L	1
NES	1
HSPA6	1
RGS5	1
IVNS1ABP	1
BTG2	1
ZBED6	1
PFKFB2	1
ATF3	1
NSL1	1
TATDN3	1
MARC1	1
HLX	1
ENAH	1
NTPCR	1
SH3YL1	1
CMPK2	1
ID2	1
RN7SL832P	1
PQLC3	1
EIF2B4	1
ZFP36L2	1
RP11-554J4.1	1
PAPOLG	1
PUS10	1
AC009501.4	1
AFTPH	1
GKN1	1
ASPRV1	1
SFXN5	1
TET3	1
VAMP8	1
VAMP5	1
TMEM150A	1
ATOH8	1
SEMA4C	1
ANKRD36	1
GCC2	1
TMEM37	1
RP11-395A13.2	1
C2orf27A	1
ARHGAP15	1
NOSTRIN	1
PPIG	1
ITGA6	1
CIR1	1
CWC22	1
FRZB	1
GULP1	1
SDPR	1
HECW2	1
NBEAL1	1
CTDSP1	1
KCNE4	1
PSMD1	1
DGKD	1
SNED1	1
PASK	1
OGG1	1
GHRL	1
PLCL2	1
TGFBR2	1
SNRK	1
SLC25A20	1
NDUFAF3	1
FAM212A	1
RBM6	1
HYAL1	1
HEMK1	1
ACY1	1
SPCS1	1
MAGI1	1
ARL6IP5	1
TRAT1	1
RP11-190C22.9	1
CCDC58	1
ITGB5	1
MGLL	1
GATA2	1
RBP1	1
RP11-485G4.2	1
TM4SF18	1
COMMD2	1
SERPINI1	1
TNFSF10	1
TRA2B	1
TBCCD1	1
PPP1R2	1
TNK2	1
MXD4	1
EVC	1
TAPT1	1
LDB2	1
SOD3	1
RP11-663P9.1	1
LNX1	1
KDR	1
IGJ	1
THAP6	1
CNOT6L	1
ANTXR2	1
ADH5	1
ENPEP	1
C4orf21	1
NDNF	1
JADE1	1
ANAPC10	1
RAPGEF2	1
CEP44	1
SORBS2	1
AHRR	1
C1QTNF3	1
SEPP1	1
ITGA1	1
PPAP2A	1
PPWD1	1
ENC1	1
CTD-2037K23.2	1
MEF2C	1
ARSK	1
GIN1	1
C5orf56	1
JADE2	1
PCDHB2	1
TAF7	1
RNF14	1
SPINK5	1
SPARC	1
MED7	1
PWWP2A	1
FGFR4	1
SCGB3A1	1
LINC00847	1
BTNL9	1
LINC01011	1
MYLIP	1
BTN3A2	1
PPP1R10	1
MDC1	1
XXbac-BPG252P9.10	1
XXbac-BPG299F13.17	1
HLA-C	1
HSPA1A	1
HSPA1B	1
SKIV2L	1
NOTCH4	1
TAPSAR1	1
PSMB9	1
BRD2	1
SRSF3	1
CPNE5	1
GLO1	1
GLTSCR1L	1
GPR116	1
FILIP1	1
RARS2	1
RP3-467N11.1	1
ARHGAP18	1
SGK1	1
BCLAF1	1
MAP3K5	1
DLL1	1
GPR146	1
FSCN1	1
AIMP2	1
PDE1C	1
SEPT7	1
HSPB1	1
RSBN1L-AS1	1
RSBN1L	1
CD36	1
CROT	1
GATAD1	1
CDK6	1
GNG11	1
PDK4	1
ACN9	1
TSC22D4	1
LRRC17	1
IFRD1	1
CAV1	1
TSPAN12	1
CALD1	1
HIPK2	1
FAM115A	1
GIMAP7	1
GIMAP4	1
DNAJB6	1
LINC00685	1
P2RY8	1
WWC3	1
OFD1	1
ZRSR2	1
TMEM47	1
MAGEH1	1
ARMCX3	1
TSC22D3	1
SMIM10	1
ZNF449	1
RP11-1114A5.4	1
HAUS7	1
AVPR2	1
UBL4A	1
RHOBTB2	1
TACC1	1
IDO1	1
C8orf4	1
PLAT	1
UBE2V2	1
AC090186.1	1
TERF1	1
HEY1	1
ZNF704	1
FABP5	1
CA2	1
GS1-251I9.4	1
RP11-100L22.1	1
NDUFAF6	1
NCALD	1
NOV	1
ENPP2	1
DENND3	1
NFIB	1
TOPORS	1
NFX1	1
HRCT1	1
TLE4	1
C9orf3	1
GSN	1
ZBTB26	1
OLFML2A	1
SH2D3C	1
SH3GLB2	1
RP11-247A12.8	1
HMCN2	1
AIF1L	1
RP11-544A12.8	1
SETX	1
ADAMTSL2	1
EGFL7	1
KIN	1
PHYH	1
RP11-295P9.3	1
ZFAND4	1
UNC5B	1
C10orf54	1
DDIT4	1
PLAU	1
MMRN2	1
LIPF	1
AVPI1	1
NKX2-3	1
LZTS2	1
C10orf76	1
ARL3	1
GSTO2	1
EDRF1	1
ECHS1	1
MOB2	1
KCNQ1OT1	1
ARFIP2	1
AKIP1	1
GALNT18	1
ACP2	1
TUT1	1
C11orf95	1
DPF2	1
MAP3K11	1
PPFIA1	1
ATG16L2	1
PPME1	1
CEP57	1
PDGFD	1
ACAT1	1
RDX	1
C11orf57	1
ZBTB16	1
ESAM	1
ROBO4	1
VPS26B	1
THYN1	1
RBP5	1
FGD4	1
RP11-350F4.2	1
RAPGEF3	1
ASB8	1
LMBR1L	1
MCRS1	1
NR4A1	1
TENC1	1
IGFBP6	1
IKZF4	1
ZC3H10	1
NABP2	1
PTGES3	1
DDIT3	1
GLIPR1L2	1
TMCC3	1
NDUFA12	1
NFYB	1
GIT2	1
HVCN1	1
MLEC	1
ZCCHC8	1
FLT1	1
N4BP2L2	1
RFXAP	1
KBTBD7	1
RGCC	1
SLC25A30-AS1	1
ZC3H13	1
ESD	1
ITM2B	1
LPAR6	1
THSD1	1
VPS36	1
MCF2L	1
GAS6	1
CDH24	1
EMC9	1
ADCY4	1
CLEC14A	1
NEMF	1
SYNE2	1
GALNT16	1
TMED8	1
CCDC88C	1
TMEM251	1
IFI27	1
HSP90AA1	1
PPP1R13B	1
INF2	1
JAG2	1
DLL4	1
EHD4	1
EIF3J-AS1	1
B2M	1
FAM214A	1
OAZ2	1
RP11-817O13.8	1
DNAJA4	1
WASH4P	1
TMEM204	1
SLC9A3R2	1
TSC2	1
EMP2	1
KNOP1	1
GPRC5B	1
GDPD3	1
RP11-146F11.1	1
MIR4519	1
ZNF668	1
CHD9	1
HERPUD1	1
PLLP	1
CX3CL1	1
MMP15	1
C16orf80	1
E2F4	1
NQO1	1
CFDP1	1
WFDC1	1
FOXF1	1
SPG7	1
RILP	1
HIC1	1
CLUH	1
CAMKK1	1
XAF1	1
TMEM88	1
C17orf59	1
HS3ST3B1	1
ZSWIM7	1
UBB	1
AC090616.2	1
SLFN12L	1
RARA	1
ATXN7L3	1
HOXB5	1
HOXB6	1
ABI3	1
TOB1	1
CA4	1
ACE	1
SCN4A	1
ICAM2	1
COG1	1
CASKIN2	1
TRIM47	1
AATK	1
ENTHD2	1
CCDC137	1
SLC14A1	1
PIAS2	1
ELAC1	1
CYB5A	1
HSBP1L1	1
ZCCHC3	1
FAM110A	1
RP11-119B16.2	1
PLCB1	1
ACSS1	1
ID1	1
COX4I2	1
CCM2L	1
ASXL1	1
SNX21	1
KCNB1	1
SNAI1	1
FAM65C	1
SOX18	1
MIER2	1
SCAMP4	1
AC005264.2	1
TBXA2R	1
CACTIN	1
INSR	1
CD320	1
KANK3	1
ZNF558	1
DNMT1	1
DOCK6	1
EPOR	1
ZNF439	1
ZNF442	1
IER2	1
IL27RA	1
DNAJB1	1
PLVAP	1
BST2	1
SLC25A42	1
ZNF493	1
ZNF43	1
PDCD5	1
GPATCH1	1
ZFP14	1
PPP1R14A	1
HNRNPL	1
PRX	1
AC006486.1	1
LIPE	1
ZNF155	1
ZNF284	1
EXOC3L2	1
FOXA3	1
HIF3A	1
PTGIR	1
STRN4	1
CARD8	1
TMEM143	1
SPHK2	1
RASIP1	1
RRAS	1
ZNF347	1
ZNF665	1
ZNF845	1
LENG9	1
TANGO2	1
AC023490.1	1
SMTN	1
YWHAH	1
TIMP3	1
CDC42EP1	1
A4GALT	1
SHANK3	1
MRPL39	1
C21orf119	1
CBR1	1
TFF3	1
ADARB1	1
PCNT	1
MT-ND4L	1
MT-ND4	1
MT-ND5	1
AL592183.1	1
RPL22	2
KLHL21	2
ENO1	2
SPSB1	2
KAZN	2
EFHD2	2
ZBTB17	2
SZRD1	2
RPL11	2
PNRC2	2
SH3BGRL3	2
MARCKSL1	2
RNF19B	2
ZC3H12A	2
RRAGC	2
YBX1	2
MED8	2
RPS8	2
UQCRH	2
TRABD2B	2
COA7	2
SERBP1	2
GNG12	2
WLS	2
CYR61	2
GBP2	2
RPL5	2
F3	2
VCAM1	2
SLC30A7	2
GNAI3	2
ATP1A1	2
MCL1	2
CTSS	2
PIP5K1A	2
S100A10	2
S100A11	2
S100A9	2
S100A8	2
S100A6	2
S100A3	2
S100A16	2
ILF2	2
RAB13	2
RPS27	2
TPM3	2
IL6R	2
ADAR	2
SYT11	2
LMNA	2
IFI16	2
DARC	2
DUSP23	2
TAGLN2	2
SLAMF1	2
ADAMTS4	2
FCER1G	2
SELP	2
SELE	2
KIAA0040	2
ABL2	2
LAMC2	2
CD55	2
G0S2	2
SLC30A1	2
TP53BP2	2
PXDN	2
RPS7	2
OST4	2
FOSL2	2
PPP1CB	2
CDC42EP3	2
CYP1B1	2
CALM2	2
PSME4	2
RPS27A	2
EFEMP1	2
AC092669.3	2
MOB1A	2
POLE4	2
TMSB10	2
LINC00152	2
ARID5A	2
RPL31	2
IL1R1	2
IL1RL1	2
IL1B	2
IL1RN	2
DBI	2
MZT2A	2
CHN1	2
NFE2L2	2
AGPS	2
ITGAV	2
TFPI	2
BZW1	2
BMPR2	2
EEF1B2	2
ADAM23	2
FN1	2
RPL37A	2
SERPINE2	2
ARL4C	2
ACKR3	2
RPL32	2
FBLN2	2
ANKRD28	2
RAB5A	2
ZNF385D	2
RPL15	2
SLC4A7	2
GOLGA4	2
RPSA	2
RPL14	2
CCRL2	2
GPX1	2
RPL29	2
GNL3	2
FLNB	2
ADAMTS9	2
ROBO1	2
CRYBG3.1	2
RPL24	2
CBLB	2
FSTL1	2
PDIA5	2
RP11-731C17.2	2
ATP1B3	2
PLSCR1	2
TM4SF1	2
SSR3	2
KPNA4	2
NCEH1	2
LAMP3	2
IQCG	2
RPL35A	2
C4orf48	2
CYTL1	2
RPL9	2
OCIAD2	2
CHIC2	2
UBA6	2
IL8	2
CXCL1	2
CXCL3	2
CXCL2	2
CXCL10	2
CXCL11	2
CCNI	2
SPP1	2
MMRN1	2
H2AFZ	2
NFKB1	2
SGMS2	2
RPL34	2
CCDC109B	2
TIFA	2
SNHG8	2
SPRY1	2
OTUD4	2
RPS3A	2
FBXW7	2
FNIP2	2
CPE	2
TLL1	2
VEGFC	2
SUB1	2
RAI14	2
RPL37	2
IL6ST	2
RAB3C	2
LRRC70	2
TAF9	2
SERF1A	2
BTF3	2
NSA2	2
F2R	2
LHFPL2	2
RPS23	2
MCTP1	2
ELL2	2
TNFAIP8	2
PPIC	2
2023-03-03	2
HINT1	2
CSF2	2
PDLIM4	2
ETF1	2
HSPA9	2
ECSCR	2
HDAC3	2
ARHGAP26	2
RPS14	2
CCDC69	2
RNF145	2
NPM1	2
CPEB4	2
NOP16	2
HNRNPAB	2
SQSTM1	2
GNB2L1	2
FOXC1	2
SERPINB1	2
SERPINB9	2
EDN1	2
CASC15	2
LRRC16A	2
UBD	2
TUBB	2
LTB	2
HLA-DRA	2
HLA-DRB5	2
HLA-DRB1	2
HLA-DQA1	2
HLA-DQB1	2
HLA-DQA2	2
TAP1	2
RPS18	2
HMGA1	2
RPS10	2
RPL10A	2
CDKN1A	2
MDGA1	2
MRPL14	2
EEF1A1	2
CD109	2
MRAP2	2
LAMA4	2
MARCKS	2
GJA1	2
NCOA7	2
CTGF	2
RPS12	2
TNFAIP3	2
HIVEP2	2
SAMD5	2
ULBP2	2
PLEKHG1	2
AKAP12	2
CNKSR3	2
SNX9	2
SOD2	2
WTAP	2
TTYH3	2
RAC1	2
THSD7A	2
ARL4A	2
IL6	2
PPIA	2
UPP1	2
CHCHD2	2
SEMA3E	2
TFPI2	2
SERPINE1	2
NAMPT	2
DNAJB9	2
TES	2
MET	2
MIR29A	2
RP11-138A9.1	2
RP11-138A9.2	2
LINC-PINT	2
MKLN1	2
TMEM178B	2
ZYX	2
FAM115C	2
TMEM176B	2
TMEM176A	2
INSIG1	2
SLC25A6	2
CD99	2
TMSB4X	2
CA5B	2
SAT1	2
TSPAN7	2
MAOB	2
TIMP1	2
RPS4X	2
RLIM	2
KLHL13	2
SLC25A5	2
RPL39	2
APLN	2
SSR4	2
FLNA	2
RPL10	2
ANGPT2	2
DLC1	2
PSD3	2
TNFRSF10B	2
CLU	2
DUSP4	2
SOX17	2
RPS20	2
SDCBP	2
ASPH	2
CYP7B1	2
RPL7	2
TCEB1	2
TMEM70	2
LY96	2
GEM	2
RPL30	2
PABPC1	2
CTHRC1	2
EIF3E	2
ENY2	2
FBXO32	2
NDUFB9	2
NDRG1	2
LY6H	2
MROH6	2
EEF1D	2
RPL8	2
KANK1	2
SPATA6L	2
IL33	2
RP11-536O18.1	2
PLIN2	2
RPS6	2
C9orf72	2
CCL21	2
TOMM5	2
SHB	2
TMEM2	2
ZFAND5	2
ANXA1	2
CTSL	2
CKS2	2
NFIL3	2
NANS	2
TXN	2
UGCG	2
PSMB7	2
RPL35	2
ARPC5L	2
RPL12	2
PTGES	2
RPL7A	2
OLFM1	2
PTGDS	2
KLF6	2
AKR1C1	2
PFKFB3	2
VIM	2
ARL5B	2
HNRNPF	2
TFAM	2
ARID5B	2
DDX21	2
RPS24	2
PPIF	2
ADIRF	2
CH25H	2
IFIT1	2
MYOF	2
PDLIM1	2
TM9SF3	2
ARHGAP19	2
RRP12	2
CRTAC1	2
DNMBP	2
EIF3A	2
CPXM2	2
PTPRE	2
RPLP2	2
NUP98	2
EIF3F	2
RPL27A	2
SWAP70	2
LYVE1	2
EIF4G2	2
PLEKHA7	2
RPS13	2
LDHA	2
HIPK3	2
CD59	2
LDLRAD3	2
APLNR	2
FTH1	2
EHD1	2
FAU	2
CFL1	2
FOSL1	2
RPS3	2
PRCP	2
CTSC	2
SESN3	2
BIRC3	2
MMP1	2
NNMT	2
TAGLN	2
ATP5L	2
RPS25	2
DPAGT1	2
WNK1	2
VWF	2
TNFRSF1A	2
GAPDH	2
CLEC2B	2
YBX3	2
EMP1	2
RP11-396F22.1	2
FKBP11	2
PCBP2	2
HNRNPA1	2
CD63	2
RPS26	2
RPL41	2
MYL6	2
NACA	2
SLC16A7	2
GNS	2
RAP1B	2
CSRP2	2
NTS	2
SLC25A3	2
TXNRD1	2
SSH1	2
RPL6	2
OAS3	2
OAS2	2
RPLP0	2
PGAM5	2
RPL21	2
POLR1D	2
SLC7A1	2
MEDAG	2
POSTN	2
COG6	2
FOXO1	2
ELF1	2
TSC22D1	2
TPT1	2
COMMD6	2
KCTD12	2
FAM155A	2
PNP	2
MMP14	2
BAZ1A	2
NFKBIA	2
RPS29	2
RPL36AL	2
CDKN3	2
CNIH1	2
SAMD4A	2
GCH1	2
HIF1A	2
RHOJ	2
ARG2	2
ACTN1	2
NPC2	2
PGF	2
GPR68	2
FBLN5	2
CRIP1	2
LPCAT4	2
SPRED1	2
THBS1	2
C15orf48	2
RAB27A	2
ALDH1A2	2
ANXA2	2
RORA	2
RAB8B	2
RPL4	2
RPLP1	2
PKM	2
COX5A	2
BCL2A1	2
KIAA1199	2
SEC11A	2
AKAP13	2
HAPLN3	2
RPS2	2
TNFRSF12A	2
LITAF	2
SNN	2
RSL1D1	2
RPS15A	2
ALDOA	2
ZNF267	2
CIRH1A	2
PDPR	2
BCAR1	2
ADAMTS18	2
COTL1	2
MAP1LC3B	2
RPL13	2
MIR22HG	2
PFN1	2
C1QBP	2
EIF5A	2
EIF4A1	2
KDM6B	2
RPL26	2
PMP22	2
SUPT6H	2
RPL23A	2
CCL14	2
CCL23	2
CCL3	2
DDX52	2
RPL23	2
RPL19	2
CSF3	2
EIF1	2
RPL27	2
GRN	2
SPAG9	2
NME1	2
VMP1	2
GNA13	2
KCNJ2	2
ITGB4	2
SPHK1	2
CYTH1	2
CANT1	2
ACTG1	2
NPLOC4	2
MAFG	2
TGIF1	2
EPB41L3	2
NDUFV2	2
TUBB6	2
SNRPD1	2
GALNT1	2
RPL17	2
PMAIP1	2
ADNP2	2
FKBP1A	2
SNRPB	2
BMP2	2
TMX4	2
JAG1	2
DSTN	2
RALGAPA2	2
CD93	2
CST3	2
CHMP4B	2
TGM2	2
TOP1	2
NFATC2	2
TSHZ2	2
RPS21	2
PPDPF	2
HELZ2	2
MADCAM1	2
R3HDM4	2
RPS15	2
OAZ1	2
TIMM13	2
DOHH	2
EEF2	2
RPL36	2
RFX2	2
ICAM1	2
ICAM5	2
KEAP1	2
C19orf43	2
GADD45GIP1	2
TPM4	2
RPL18A	2
UBA52	2
FXYD5	2
ZNF529	2
EIF3K	2
PAF1	2
RPS16	2
AC011526.1	2
RPS19	2
PLAUR	2
PVR	2
PVRL2	2
RELB	2
AP2S1	2
RPL18	2
RPL13A	2
RPS11	2
MBOAT7	2
RPS9	2
RPL28	2
ZNF587B	2
RPS5	2
RPS4Y1	2
MIF	2
SELM	2
RTCB	2
HMOX1	2
CSF2RB	2
LGALS1	2
EIF3L	2
RPL3	2
TSPO	2
C21orf91	2
BACH1	2
IFNGR2	2
RCAN1	2
CBR3	2
CLDN14	2
ERG	2
ETS2	2
BACE2	2
MX2	2
MX1	2
COL6A1	2
COL6A2	2
MTHFR	3
LUZP1	3
C1orf63	3
FAM110D	3
FCN3	3
ZNF362	3
GJA4	3
EVA1B	3
PLK3	3
SRSF11	3
ST7L	3
RP11-782C8.5	3
HIST2H2BE	3
VAMP4	3
IER5	3
RGS16	3
ITPKB	3
SNAP47	3
SRSF7	3
MITD1	3
LINC00116	3
SLC20A1	3
INHBB	3
CXCR4	3
NR4A2	3
CLK1	3
FAM126B	3
EGOT	3
BHLHE40	3
PRKAR2A	3
MTRNR2L12	3
RYK	3
SEC62	3
EIF4A2	3
HES1	3
EMCN	3
MCCC2	3
MTRNR2L2	3
IRF1	3
EGR1	3
HBEGF	3
PDGFRB	3
GABRP	3
DUSP1	3
PRR7	3
EFHC1	3
SNX3	3
ZBTB2	3
RAPGEF5	3
AKAP9	3
FAM133B	3
POLR2J	3
KMT2E-AS1	3
PODXL	3
TSPYL2	3
PIN4	3
XIST	3
ZMAT1	3
PCMTD1	3
FABP4	3
RUNX1T1	3
KLF10	3
KB-1732A1.1	3
AQP7	3
TPM2	3
KLF4	3
SPTAN1	3
IER5L	3
FAM188A	3
CXCL12	3
ZNF503	3
ADM	3
MTRNR2L8	3
C11orf96	3
ATG13	3
FRMD8	3
NEAT1	3
MALAT1	3
FXYD6	3
SLC2A3	3
KLRB1	3
HDAC7	3
RND1	3
NCKAP5L	3
NDUFA4L2	3
RSRC2	3
N4BP2L1	3
RB1	3
ARHGEF7	3
RPPH1	3
RALGAPA1	3
FOS	3
IRF2BPL	3
NPTN	3
SNHG9	3
NLRC5	3
ARL2BP	3
POLR2C	3
ATP2A3	3
ARHGEF15	3
JUP	3
STAT3	3
HIGD1B	3
SCRN2	3
CDK5RAP3	3
HOXB2	3
H3F3B	3
SOCS3	3
RBM39	3
PREX1	3
MIDN	3
GADD45B	3
AES	3
DPP9	3
TNFSF9	3
KANK2	3
JUNB	3
KLF2	3
UPF1	3
MED29	3
ZFP36	3
SERTAD1	3
SERTAD3	3
CIC	3
CTB-171A8.1	3
BCL3	3
FOSB	3
IRF3	3
ZFP28	3
